# Supplementary material for: A visible-light photodetector based on heterojunctions between CuO nanoparticles and ZnO nanorods
Source: publisher site journal article supplement (doi:10.3762/bjnano.14.84), 2023-10-13
Supplement: Additional file 1 [file 2190-4286-14-84-S1.pdf]

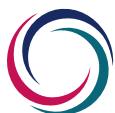

## Supporting Information

for

### **A visible-light photodetector based on heterojunctions between CuO nanoparticles and ZnO nanorods**

Doan Nhat Giang, Nhat Minh Nguyen, Duc Anh Ngo, Thanh Trang Tran, Le Thai Duy, Cong Khanh Tran, Thi Thanh Van Tran, Phan Phuong Ha La and Vinh Quang Dang

*Beilstein J. Nanotechnol.* **2023**, *14*, 1018–1027. doi:10.3762/bjnano.14.84

## Additional figures

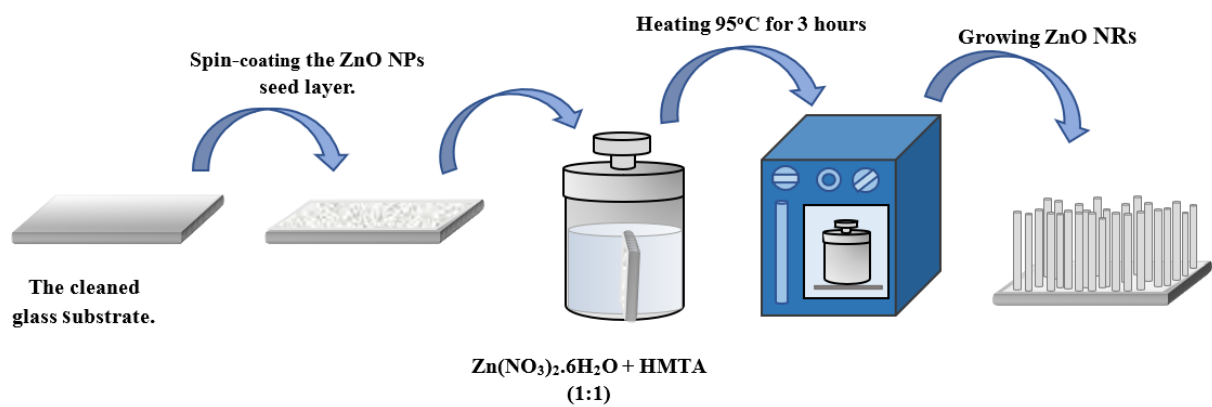

**Figure S1:** Synthesis of ZnO NRs.

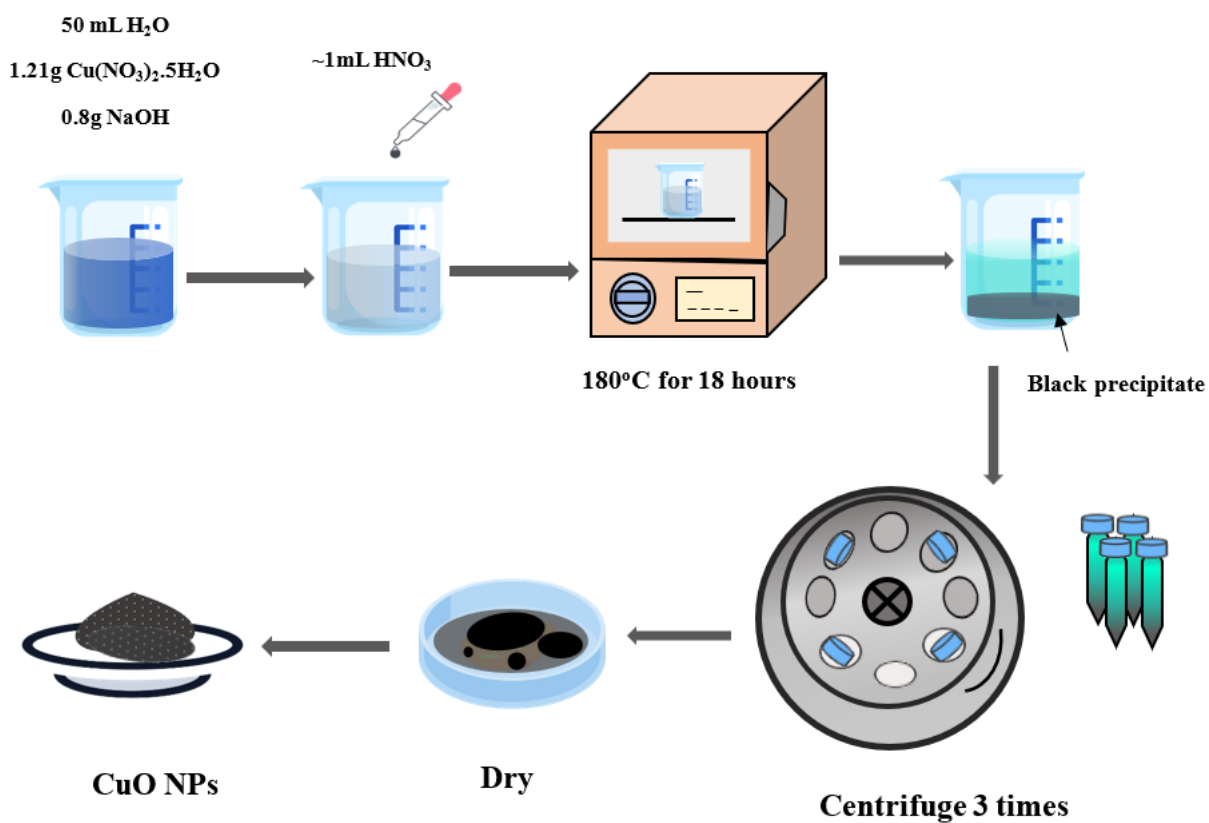

**Figure S2:** Synthesis of CuO NP powder.
